# Supplementary material for: Opening the Pathway: An Example of Universal Design for Learning as a Guide to Inclusive Teaching Practices
Source: Atypon-hosted journal article supplement (doi:10.1187/cbe.21-09-0239), 2022-04-11
Supplement: combinedsupmats.pdf [file combinedsupmats.pdf]

# Supplemental Material

CBE—Life Sciences Education

Orndorf *et al.*

## **SUPPLEMENTAL MATERIAL**

[Opening the Pathway to Technician Careers: A Conference for Biology Teachers of Deaf Students Website](https://qubeshub.org/community/groups/opening_the_pathway) [https://qubeshub.org/community/groups/opening\_the\_pathway]

[Conference Resources](https://qubeshub.org/community/groups/opening_the_pathway/schedule/case_resources)

[https://qubeshub.org/community/groups/opening\_the\_pathway/schedule/case\_resources]
